# Supplementary material for: Agonists and allosteric modulators promote signaling from different metabotropic glutamate receptor 5 conformations
Source: PubMed Central journal article supplement — Cell Rep. 2021 Aug 31;36(9):109648. doi: 10.1016/j.celrep.2021.109648 (PMC8424648; doi:10.1016/j.celrep.2021.109648), 2021-08-31
Supplement: mmc1.pdf [file mmc1.pdf]

## Supplemental information

### Agonists and allosteric modulators

promote signaling from different

metabotropic glutamate receptor 5 conformations

Chady Nasrallah, Giuseppe Cannone, Julie Briot, Karine Rottier, Alice E. Berizzi, Chia-Ying Huang, Robert B. Quast, Francois Hoh, Jean-Louis Banères, Fanny Malhaire, Ludovic Berto, Anaëlle Dumazer, Joan Font-Ingles, Xavier Gómez-Santacana, Juanlo Catena, Julie Kniazeff, Cyril Goudet, Amadeu Llebaria, Jean-Philippe Pin, Kutti R. Vinothkumar, and Guillaume Lebon

1 **Supplementary information**

2 **Agonists and allosteric modulators promote signalling from different**  
3 **metabotropic glutamate receptor 5 conformations [115]**

4  
5 **Chady Nasrallah<sup>1,9</sup>, Giuseppe Cannone<sup>2,9</sup>, Julie Briot<sup>1,9</sup>, Karine Rottier<sup>1</sup>, Alice E. Berizzi<sup>1</sup>,**  
6 **Chia-Ying Huang <sup>3</sup>, Robert B. Quast<sup>4</sup>, Francois Hoh<sup>4</sup>, Jean-Louis Banères<sup>5</sup>, Fanny**  
7 **Malhaire<sup>1</sup> Ludovic Berto<sup>1</sup>, Anaëlle Dumazer<sup>1</sup>, Joan Font-Ingles<sup>6</sup>, Xavier Gómez-**  
8 **Santacana<sup>1,6</sup>, Juanlo Catena<sup>6,7</sup>, Julie Kniazeff<sup>1</sup>, Cyril Goudet<sup>1</sup>, Amadeu Llebaria<sup>6</sup>, Jean-**  
9 **Philippe Pin<sup>1</sup>, Kutti R. Vinothkumar<sup>8\*</sup>, Guillaume Lebon<sup>1,10\*</sup>.**

10  
11 <sup>1</sup> IGF, Université de Montpellier, CNRS, INSERM, 34094, Montpellier, France

12 <sup>2</sup> MRC Laboratory of Molecular Biology, Cambridge, CB2 0QH, UK

13 <sup>3</sup> Swiss Light Source, Paul Scherrer Institute, CH-5232, Villigen, Switzerland

14 <sup>4</sup> CBS, Université de Montpellier, CNRS, INSERM, 34094, Montpellier, France

15 <sup>5</sup> IBMM, Université de Montpellier, CNRS, ENSCM, 34093, Montpellier, France

16 <sup>6</sup> MCS, Laboratory of Medicinal Chemistry and Synthesis, Institute of Advanced Chemistry of  
17 Catalonia (IQAC-CSIC), Barcelona, Spain.

18 <sup>7</sup> SIMChem, Synthesis of High Added Value Molecules, Institute of Advanced Chemistry of  
19 Catalonia (IQAC-CSIC), Barcelona, Spain

20 <sup>8</sup> National Centre for Biological Sciences TIFR, GKVK Post, Bellary Road, Bangalore,  
21 560065, India

22 <sup>9</sup> These authors contributed equally

23 <sup>10</sup> Lead Contact

24 \*Correspondence to: [ykumar@ncbs.res.in](mailto:ykumar@ncbs.res.in) ; [guillaume.lebon@igf.cnrs.fr](mailto:guillaume.lebon@igf.cnrs.fr)

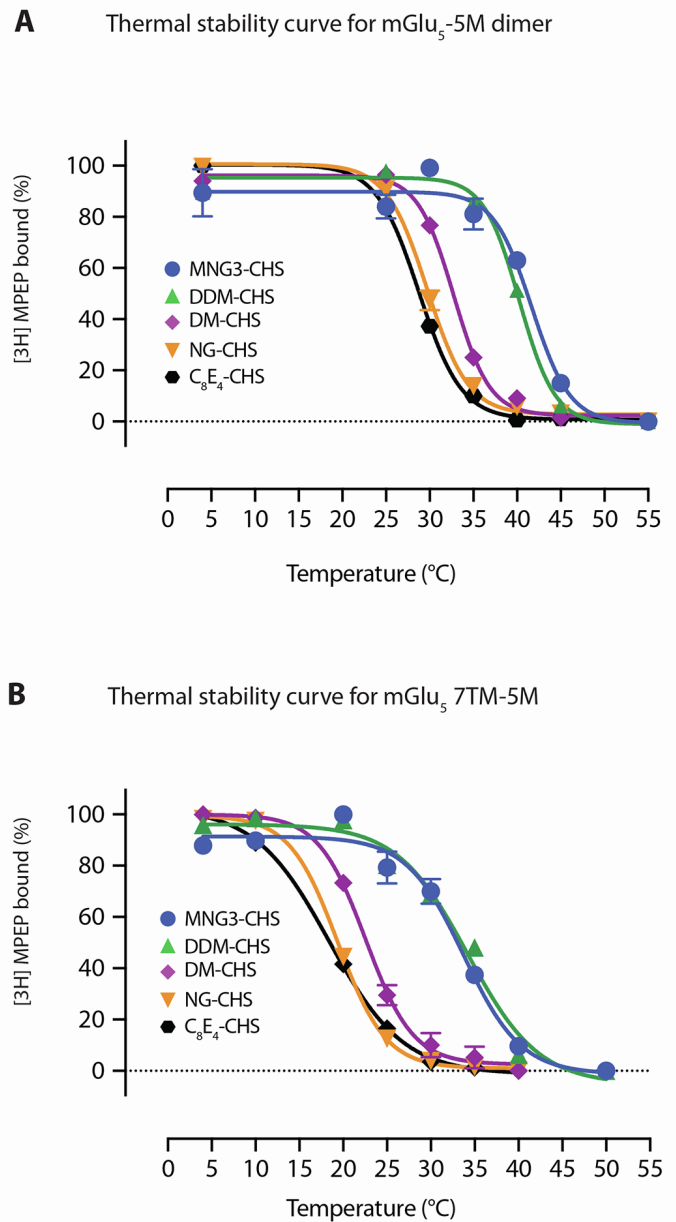

35

36

37 **Figure S1.** Thermal stability measurements of mGlu<sub>5</sub>-5M receptor solubilised in detergents,  
 38 Related to Figure 1 and Table S2. (A) Thermostability of the mGlu<sub>5</sub>-5M dimer was measured  
 39 using [<sup>3</sup>H]-MPEP binding assay after extraction in different detergents including C<sub>8</sub>E<sub>4</sub> (Black),  
 40 NG (Orange), DM (Magenta), DDM (Green) and MNG3 (Blue), all supplemented with CHS.  
 41 (B) Thermostability of the 7TM domain of mGlu<sub>5</sub>-5M was measured for the same set of  
 42 detergents. Experiments were performed in duplicates and each curve represents the average  
 43 of three independent experiments with the exception of C<sub>8</sub>E<sub>4</sub> for the mGlu<sub>5</sub>-5M construct. T<sub>m</sub>  
 44 mean values are presented in Table S2.

45

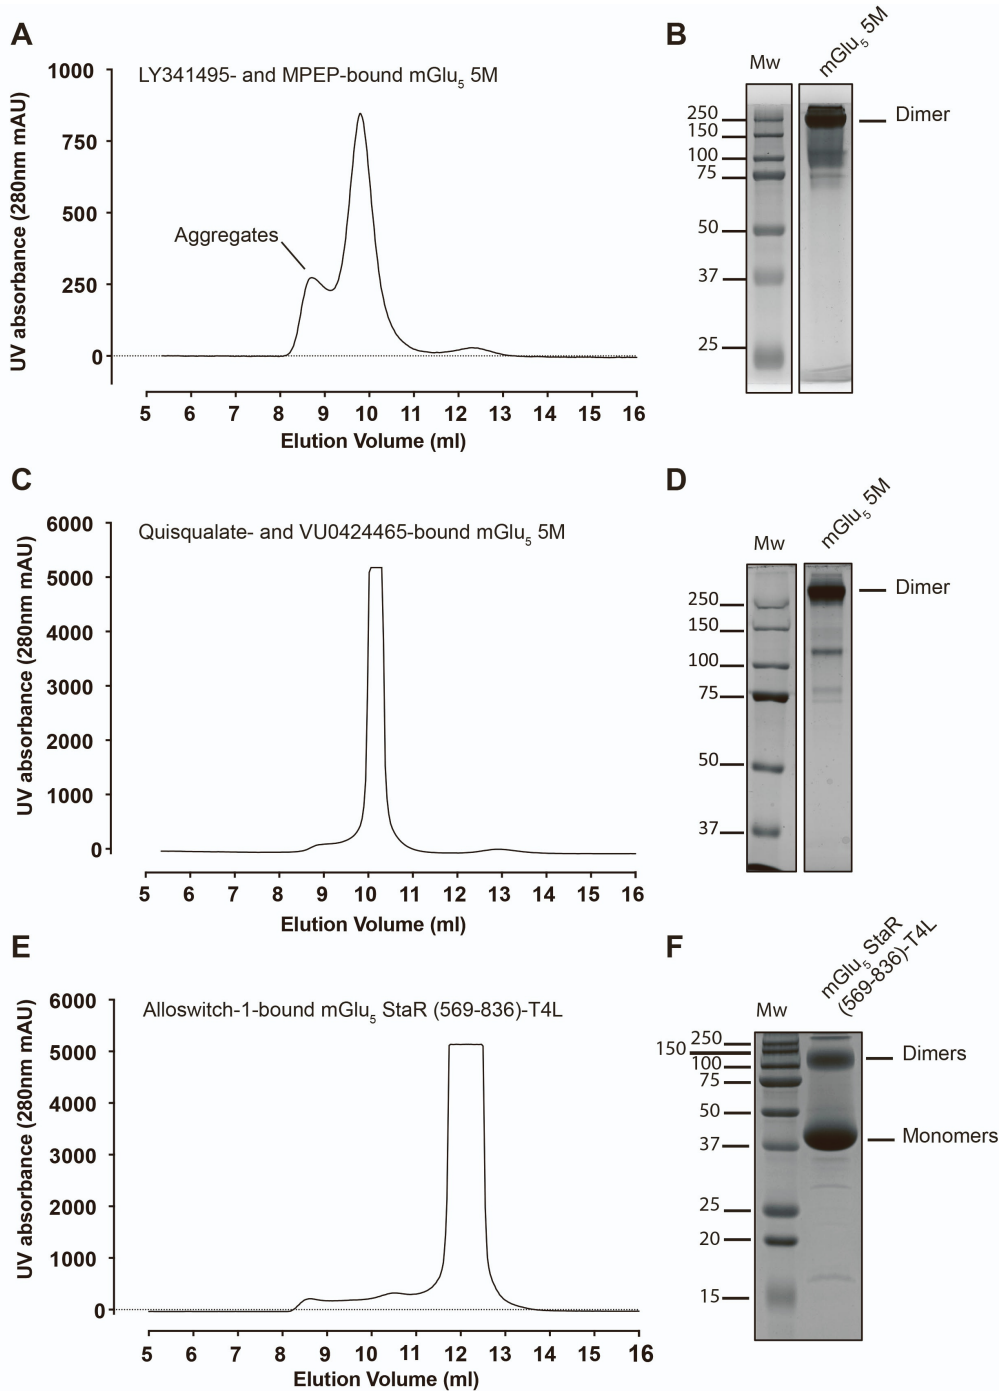

46  
47  
48  
49  
50  
51  
52  
53  
54  
55

**Figure S2.** Size exclusion chromatography and SDS-gel of detergent-purified thermostabilised mGlu<sub>5</sub> receptor, Related to Figure 2 and Figure 4. Size exclusion chromatography was performed using 24 ml S200 column for thermostabilised mGlu<sub>5</sub>-5M dimer bound to inhibitors (A), activators (C) and mGlu<sub>5</sub>-StaR(569-836)-T4L bound to alloswitch-1 (E). 10% SDS-gel electrophoresis of purified thermostabilised mGlu<sub>5</sub>-5M dimer bound to antagonist and NAM (B), agonist and PAM (D) and 15% SDS-gel electrophoresis of purified mGlu<sub>5</sub>-StaR(569-836)-T4L bound to alloswitch-1 (F).



**A**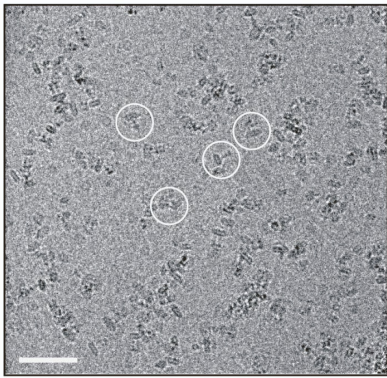**B**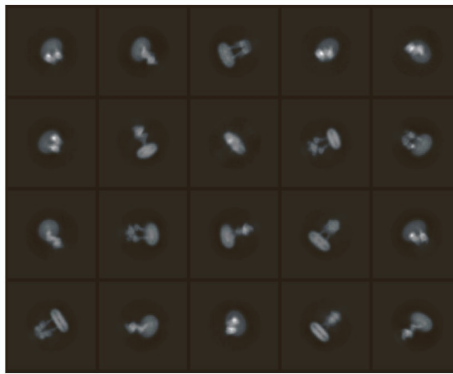**C**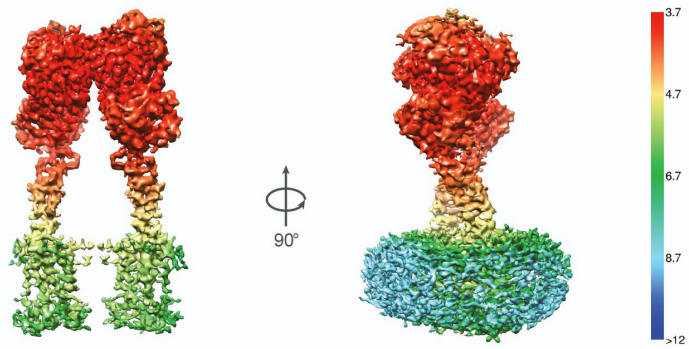**D**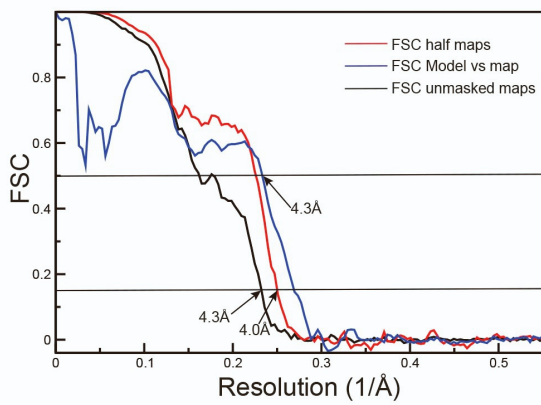**E**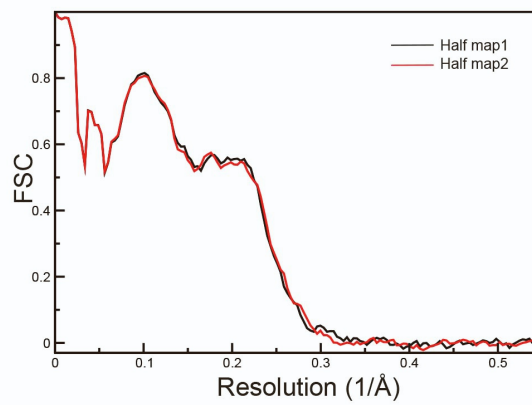**F**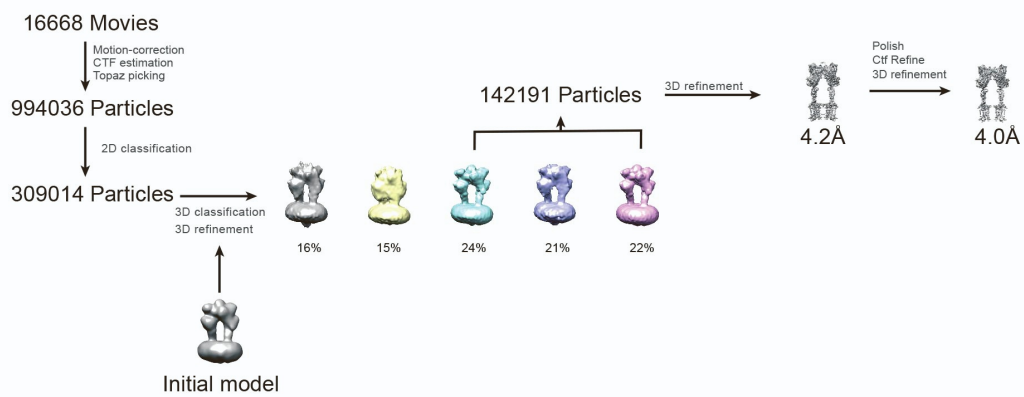

57

58 **Figure S3.** CryoEM analysis of LY341495 and MPEP-bound mGlu<sub>5</sub> conformation, Related to  
59 Figure 2. (A) A representative micrograph of antagonist and NAM bound mGlu<sub>5</sub> in detergent  
60 micelles on ice. Scale bar is 500Å. (B) A selection of reference-free 2D class averages of mGlu<sub>5</sub>  
61 in antagonist bound conformation showing the distinct domains of the protein. The box size is  
62 128 pixels and sampled at 3.56 Å. (C) Local resolution plot of antagonist mGlu<sub>5</sub> bound as  
63 determined with Relion 3.1. Two different views of the maps are shown at different thresholds.  
64 The molecule on the right has been rotated to show a different view of mGlu<sub>5</sub> and is at lower  
65 threshold. The lower threshold where the 7TM is covered by the detergent/lipid belt and the  
66 higher threshold showing the helices of the 7TM. Much of the VFT is between resolutions of  
67 3.7 to 5 Å but the C-terminal part of CRD and the 7TM are of lower resolution. (D) The Fourier  
68 shell correlation (FSC) curves of two half-maps with mask (blue), unmasked maps (black) and  
69 the map and model (red) are shown. The estimated resolution by comparison of the two half-  
70 maps from refinement and postprocessing at FSC 0.143 is 4.0 Å and the one of map vs model  
71 at FSC 0.5 is 4.3 Å. The FSC curves were estimated for the full molecule. (E) To verify  
72 overfitting of the model refinement, one of the half-map used in refinement and the other half-  
73 map was used as test. (F) The CryoEM workflow showing the different steps used to obtain  
74 the final map.

75

**A**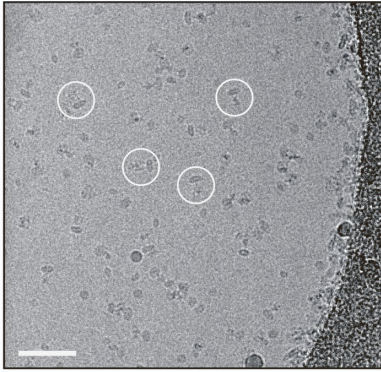**B**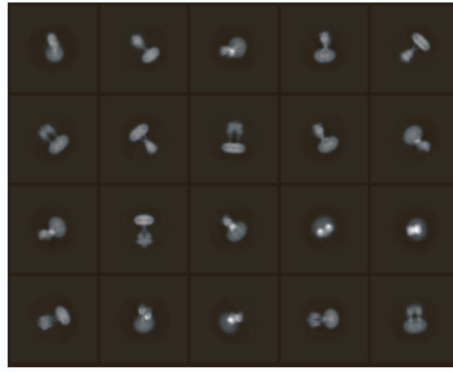**C**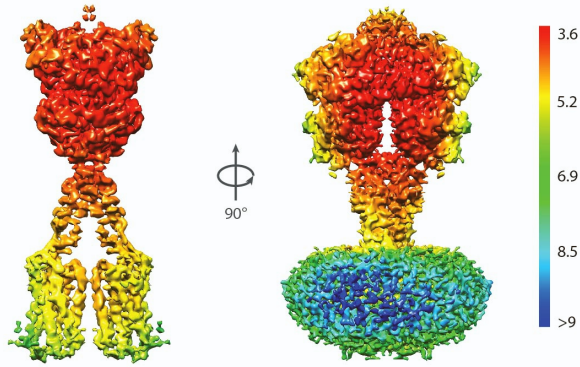**D**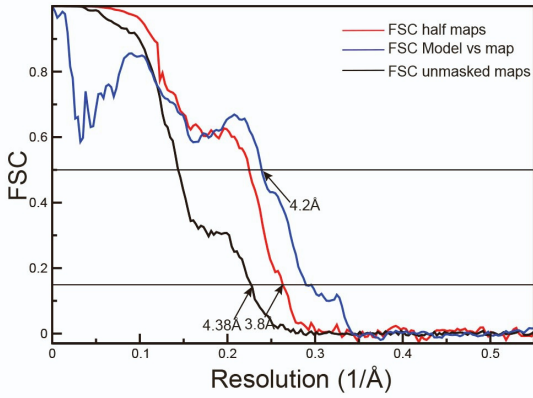**E**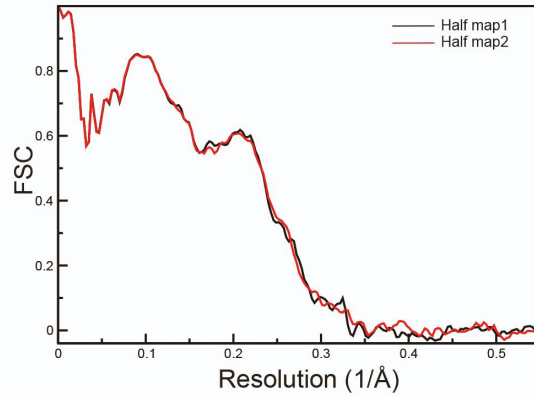**F**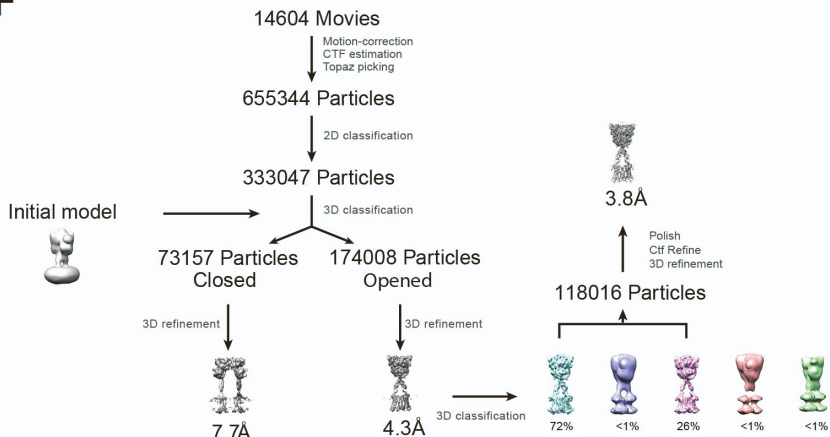

77 **Figure S4.** Cryo EM analysis of quisqualate and VU0424465-bound mGlu<sub>5</sub> conformation,  
78 Related to Figure 2. (A) A representative micrograph of agonist and PAM bound mGlu<sub>5</sub> in  
79 detergent micelles on ice. Scale bar is 500 Å. (B) A selection of reference-free 2D class  
80 averages of mGlu<sub>5</sub> in closed conformation showing the distinct domains of the protein. The  
81 box size is 128 pixels and sampled at 3.56 Å. (C) Local resolution plot of mGlu<sub>5</sub> bound to  
82 quisqualate as estimated with Relion 3.1. Two different views of the maps are shown at  
83 different thresholds that hides detergent belt. The molecule on the right shows a rotated view  
84 of mGlu<sub>5</sub>. Much of the VFTs are between resolutions of 3.6 to 5 Å but the C-terminal part of  
85 CRDs and the 7TMs are of lower resolution. (D) The Fourier shell correlation (FSC) curves of  
86 two half-maps with mask (blue), unmasked maps (black) and the map and model (red) are  
87 shown. The estimated resolution by comparison of the two half-maps from refinement and  
88 postprocessing at FSC 0.143 of half-maps is 3.8 Å and that of the map vs model at FSC 0.5 is  
89 4.2 Å. The FSC curves were estimated for the full molecule. (E) Cross-validation of model  
90 refinement. To verify overfitting of the model refinement, one of the half-map used in  
91 refinement and the other half-map was used as test. (F) The CryoEM workflow showing the  
92 different steps used to obtain the final map.

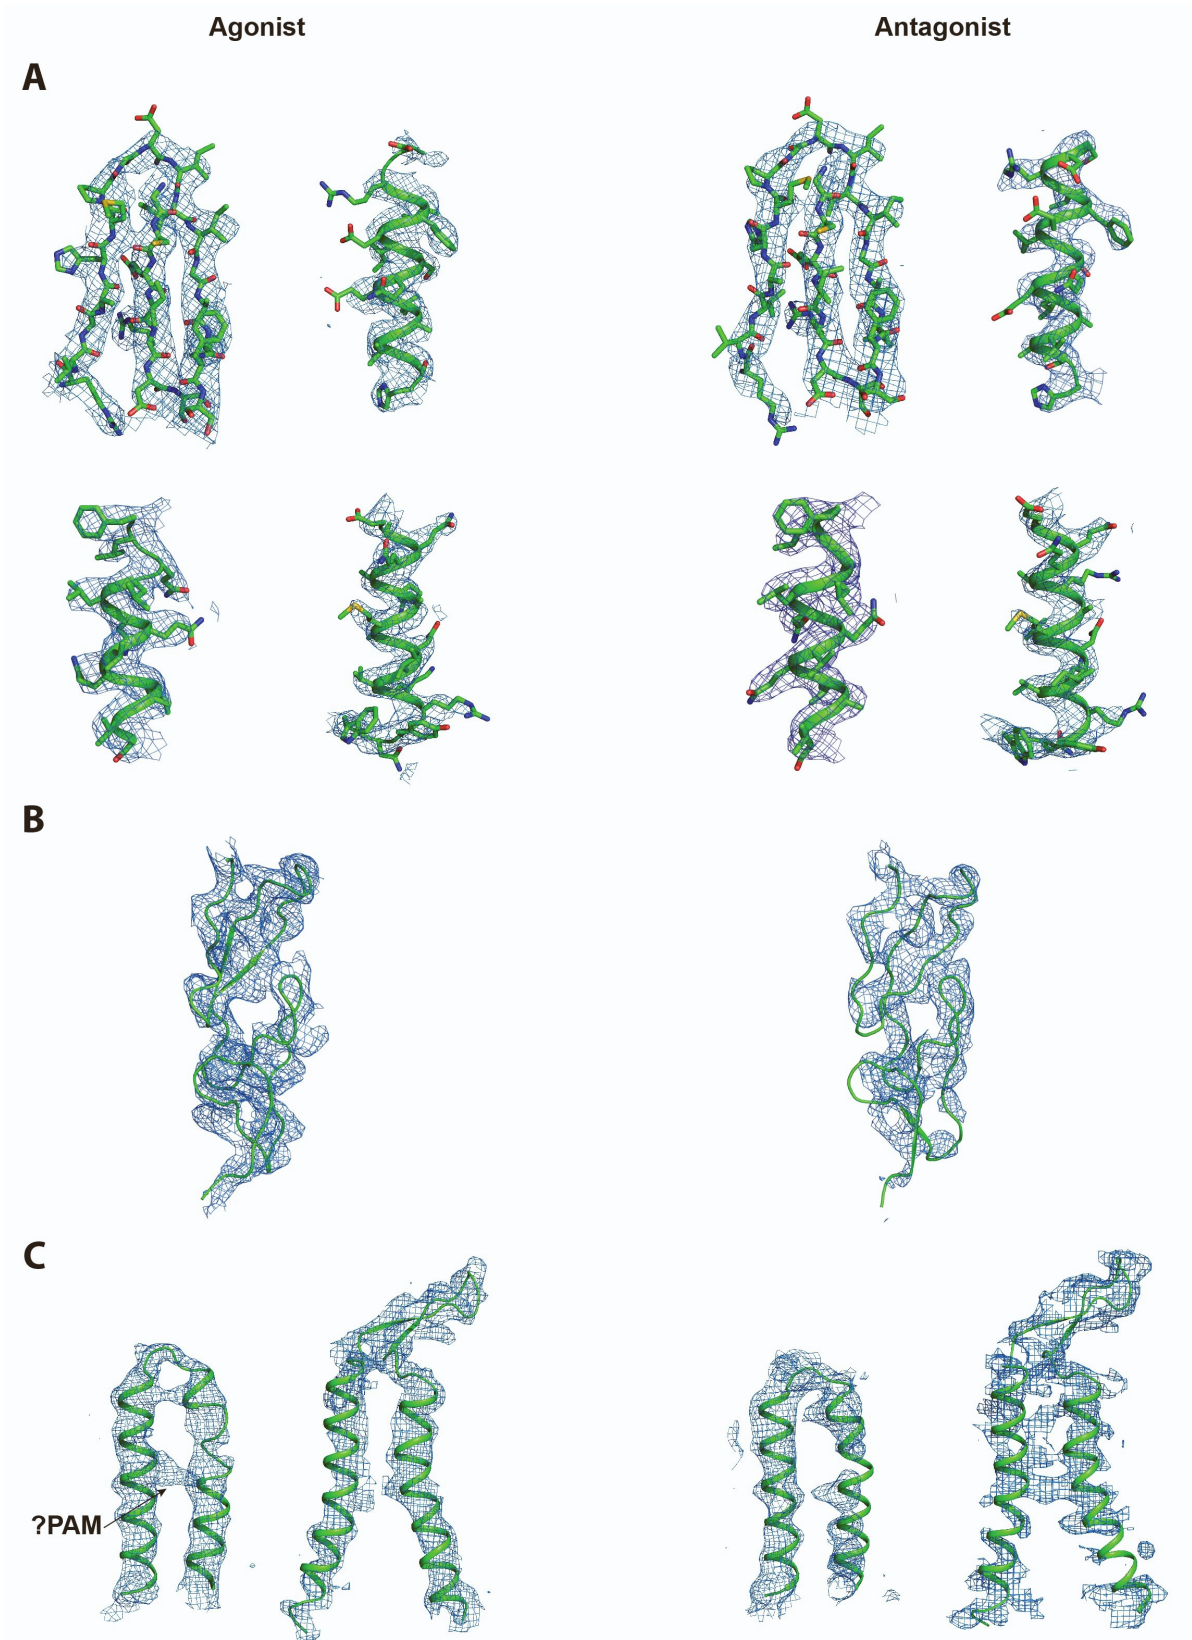

93

94 **Figure S5.** EM maps of select regions of full-length mGlu<sub>5</sub>-5M bound to agonist (quisqualate)  
 95 and antagonist (LY341495), Related to Figure 2. (A)  $\alpha$ -helical and  $\beta$ -sheet regions from the  
 96 VFT domain. The regions from each model include residues 26-42, 92-98 ( $\beta$ -sheet), 101-116,

97 153-165, 195-211 ( $\alpha$ -helices). EM maps sharpened with B-factor of  $-122 \text{ \AA}^2$  and  $-164 \text{ \AA}^2$  for  
98 agonist and antagonist respectively were used to represent the density using Pymol. (B) The  
99 region comprising the CRD is shown. Only the backbone of the model is depicted due to lower  
100 resolution. EM maps sharpened with B-factor of  $-61 \text{ \AA}^2$  and  $-82 \text{ \AA}^2$  for agonist and antagonist  
101 respectively was used for depiction of maps using Pymol. (C) Two stretches of residues (690-  
102 760, 775-818) in the 7TM for agonist and antagonist are shown. In the agonist map, the extra  
103 density observed between the two helices, which is most likely the ligand PAM used in the  
104 preparation is marked with black arrow. The density for 7TMs of agonist is better than the  
105 antagonist and is clearly visualised in the maps. The docking of the TMD into the EM maps  
106 was aided by the X-ray structure of the 7TM. EM maps sharpened with B-factor of  $-61 \text{ \AA}^2$  and  
107  $-82 \text{ \AA}^2$  for agonist and antagonist respectively was used for display of maps using Pymol.  
108



**A** LY341495-bound mGlu<sub>5</sub> structure (7FD9)

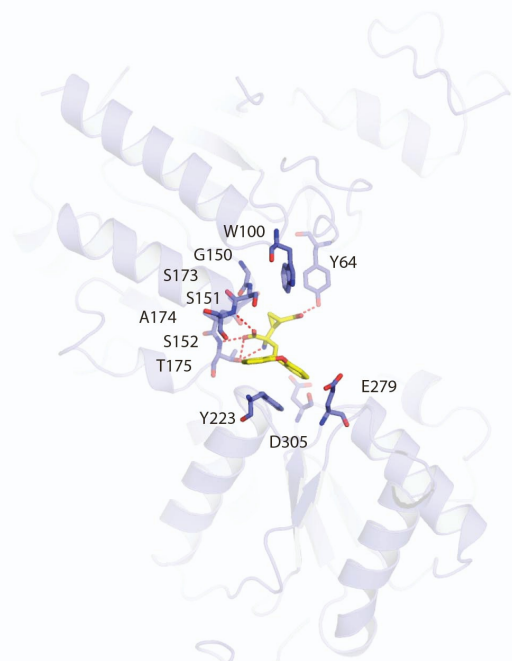

**B** LY341495-bound mGlu<sub>1</sub> structure (3KS9)

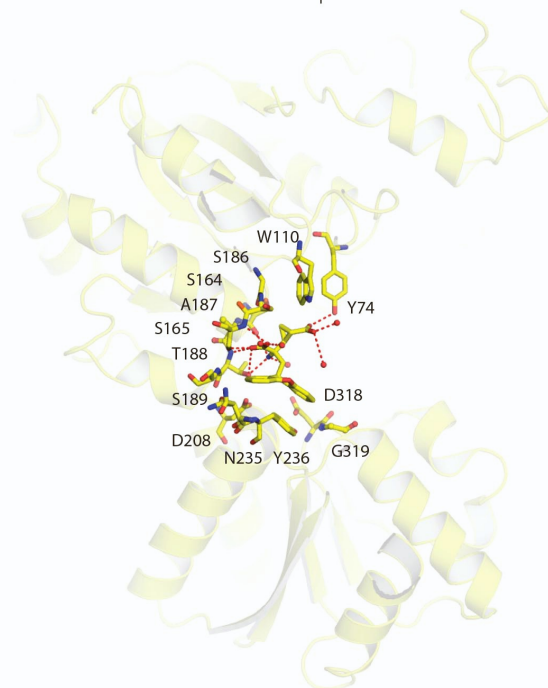

**C** LY341495-bound mGlu<sub>7</sub> structure (3MQ4)

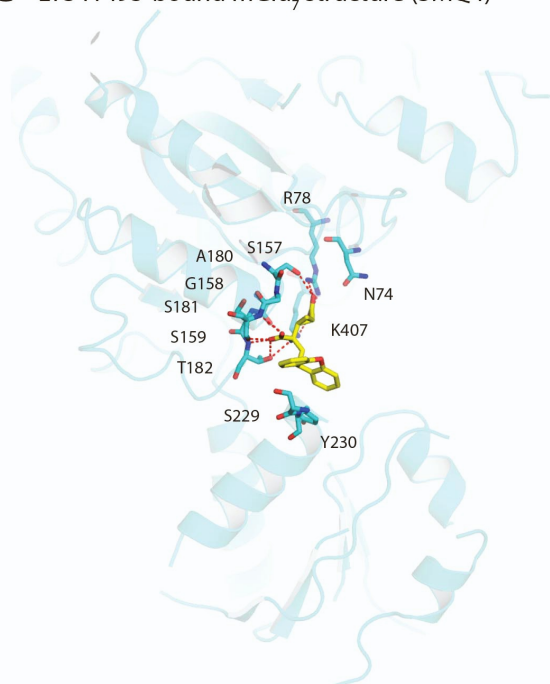

**D** LY341495-bound mGlu<sub>3</sub> structure (3SM9)

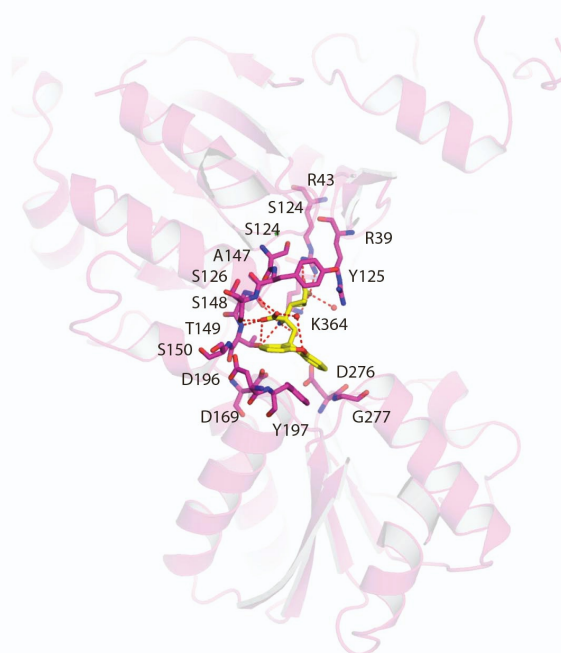

109

110 **Figure S6.** Comparison of the LY341495 binding site in the VFT of mGlu receptors that  
111 belongs to three different groups, Related to Figure 3. (A) The LY341495 binding to mGlu<sub>5</sub>  
112 pocket observed from this work and belongs to the group I, (B) from the mGlu<sub>1</sub> structure (PDB  
113 3KS9) that belongs to the same group, (C) mGlu<sub>7</sub> structure (PDB 3MQ4) that belongs to group  
114 III and (D) mGlu<sub>3</sub> structure (PDB 3SM9) that belongs to group II.

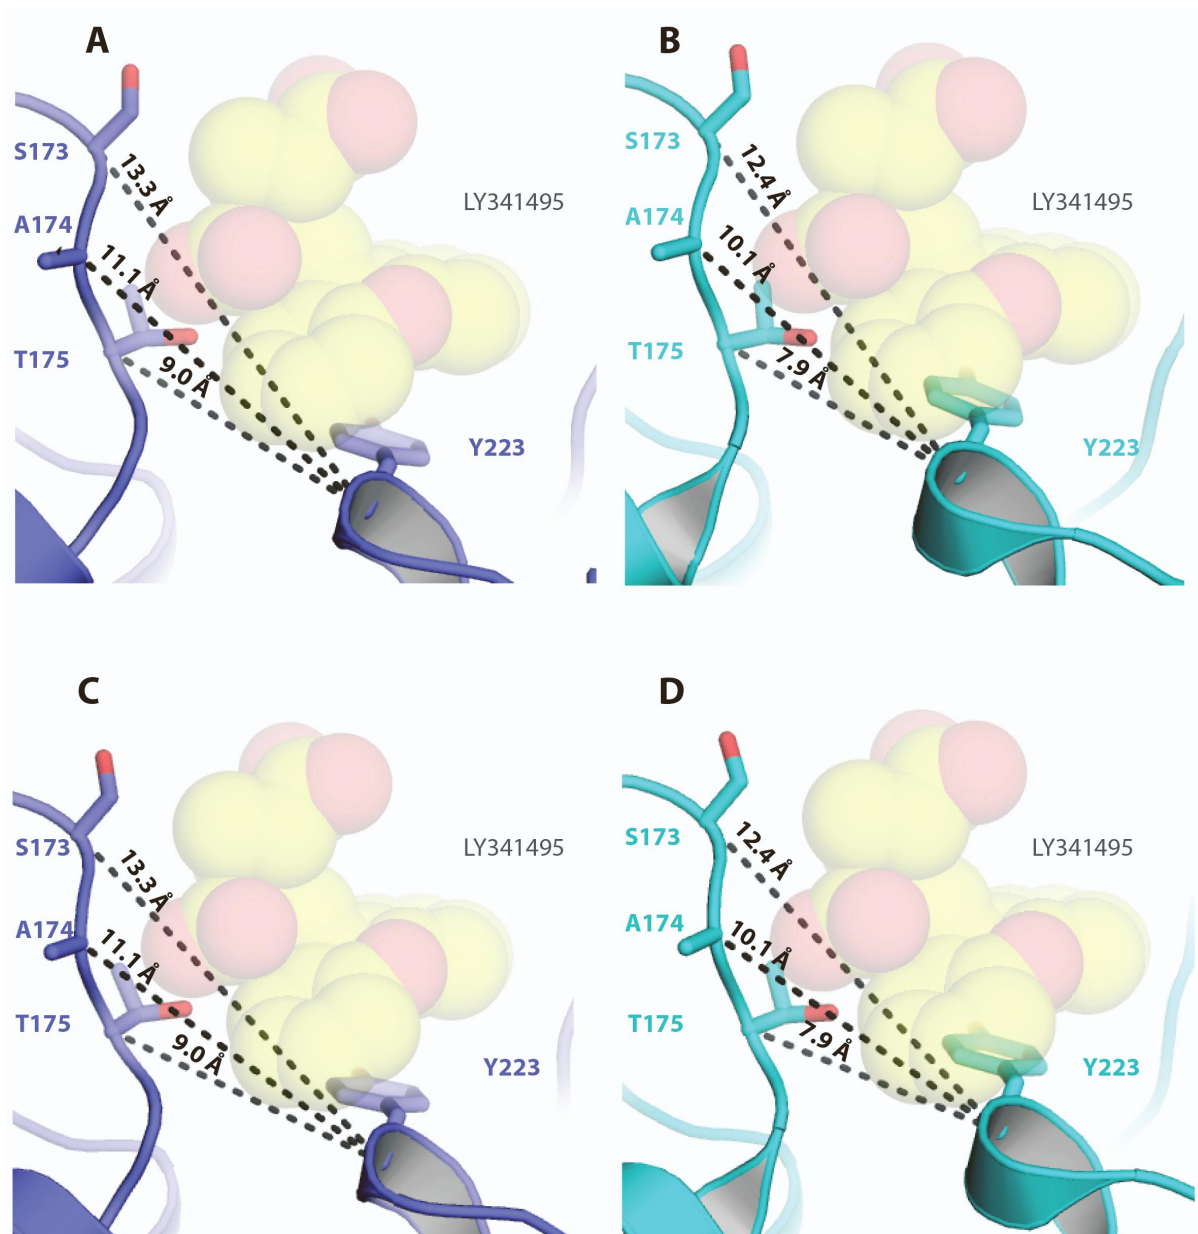

116

117 **Figure S7.** Binding of LY341495 is likely to require a larger opening of the VFT, Related to  
 118 Figure 3. (A-D) Distances between C $\alpha$  of the Y223 in lobe II and T173, A174 and S175 in  
 119 lobe I of protomer A (shown in panels A and B) and protomer B (shown in panels C and D).  
 120 LY341494-bound mGlu<sub>5</sub> model is represented in blue (A and C) and apo inactive conformation  
 121 (PDB 6N52) in cyan (B and D).

122



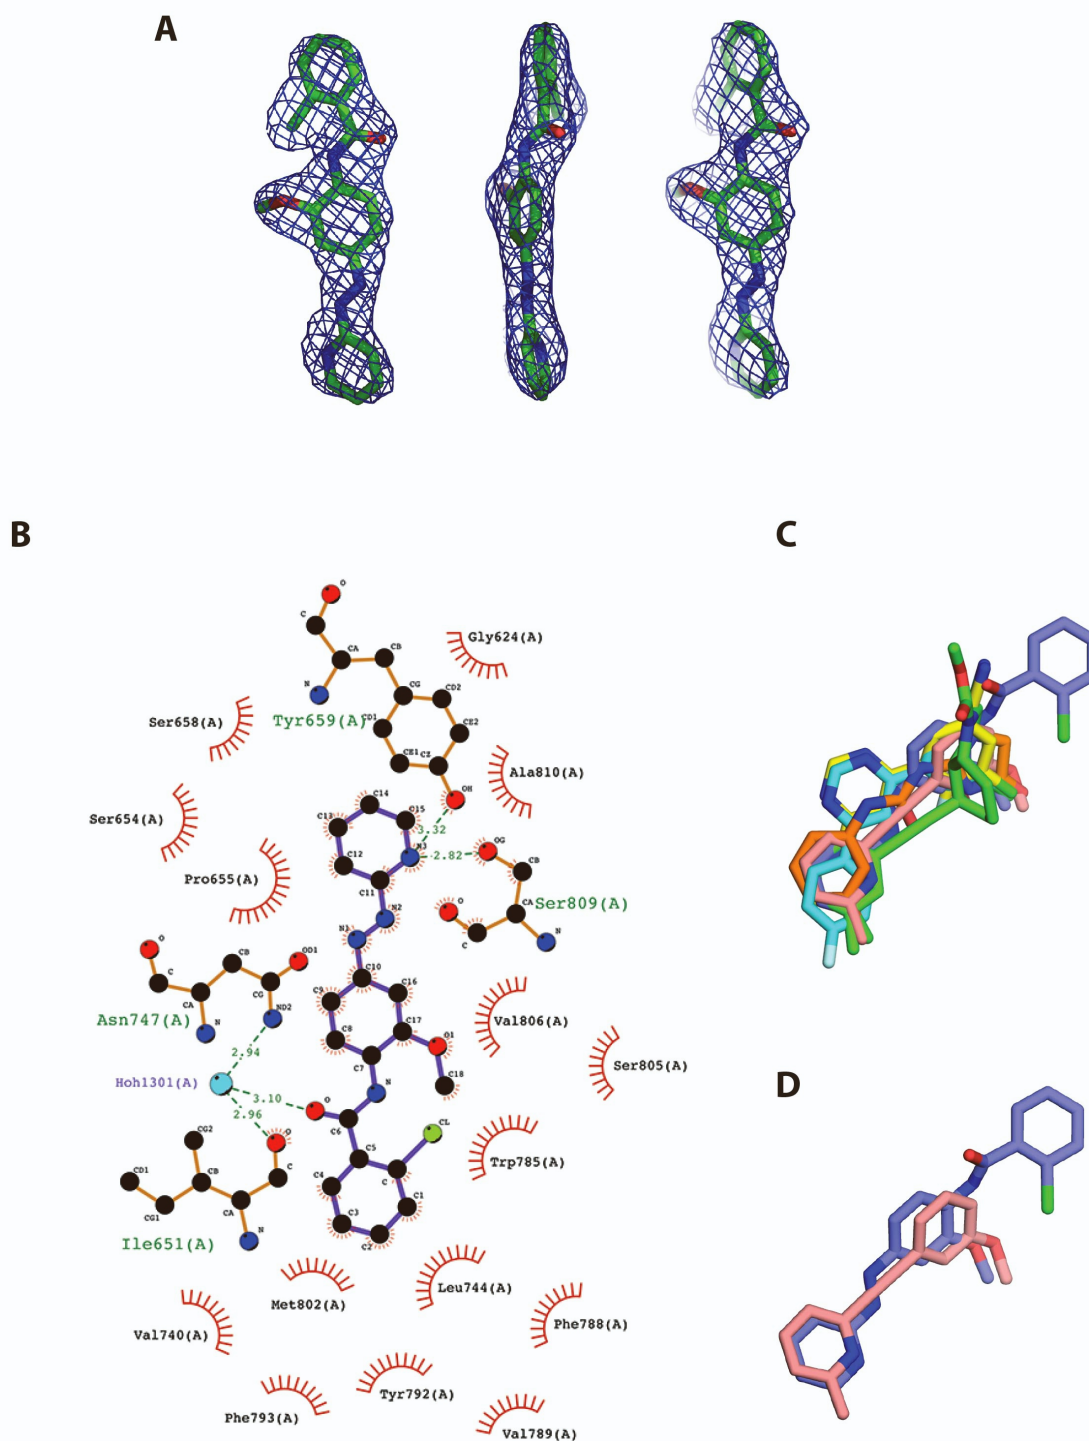

123

124 **Figure S8.** Alloswitch-1 binding mode in the 7TM domain of the mGlu<sub>5</sub> 7TM, Related to  
 125 Figure 4. (A) 2Fo-Fc map for alloswitch-1 bound to the thermostabilised 7TM domain of the  
 126 human mGlu<sub>5</sub> receptor. Map was calculated using Refmac and figure made with pymol at 1.5  
 127  $\sigma$ . (B) 2D representation of Alloswitch-1 ligand binding site. 2D plot was generated using  
 128 LigPlot<sup>+</sup>. (C) Alloswitch-1 superposition with the NAM co-crystallised with the mGlu<sub>5</sub> Star

129 7TM domain. Alloswitch-1 superposition with Mavoglurant (Green; 4OO9), M-MPEP (Light  
130 pink; 6FFI), Fenobam (Orange; 6FFH), HTL14242 (Cyan; 5CGD), HTL14242 derivative  
131 (yellow; 5CGC), Alloswitch-1 (Purpleblue; 7P2L). NAMs are coloured as indicated in brackets  
132 along with the PDB code. (D) Alloswitch-1 superposition with M-MPEP.  
133

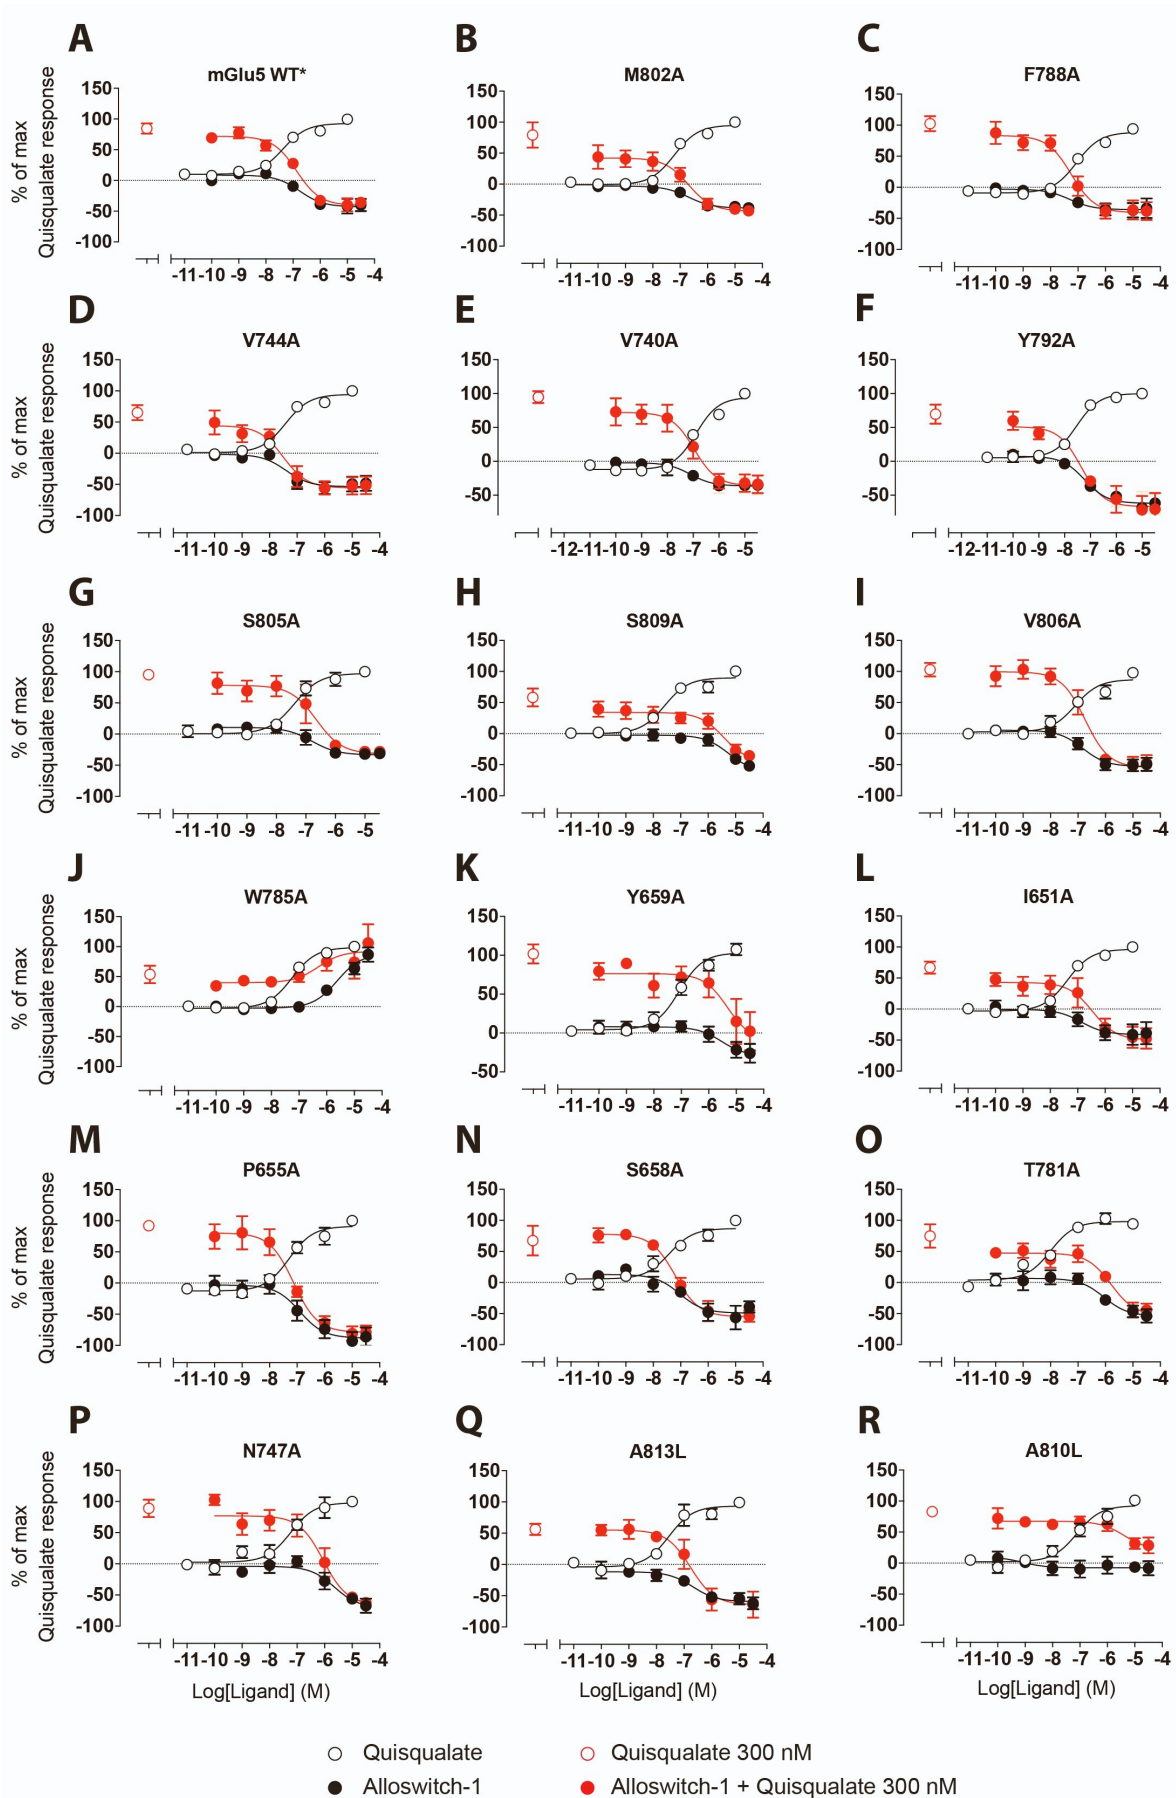

135 **Figure S9.** Probing the quisqualate and alloswitch-1 binding sites of mGlu<sub>5</sub> under dark  
136 conditions with IP<sub>1</sub> accumulation assay, Related to Figure 4. (A-R) Quisqualate-induced IP<sub>1</sub>  
137 accumulation (open circles) and alloswitch-1 inhibition of IP<sub>1</sub> accumulation in the presence  
138 (red circles) or absence (black circles) of a fixed concentration of quisqualate (300 nM; red  
139 circle) for mGlu<sub>5</sub> mutants, under dark conditions. Single point mutations were tested for their  
140 response to quisqualate and/or alloswitch-1 function of the mGlu<sub>5</sub>. Data are expressed as a  
141 percentage of the maximal quisqualate response and represent the mean ± S.E.M. of at least  
142 three independent experiments performed in duplicate.

143

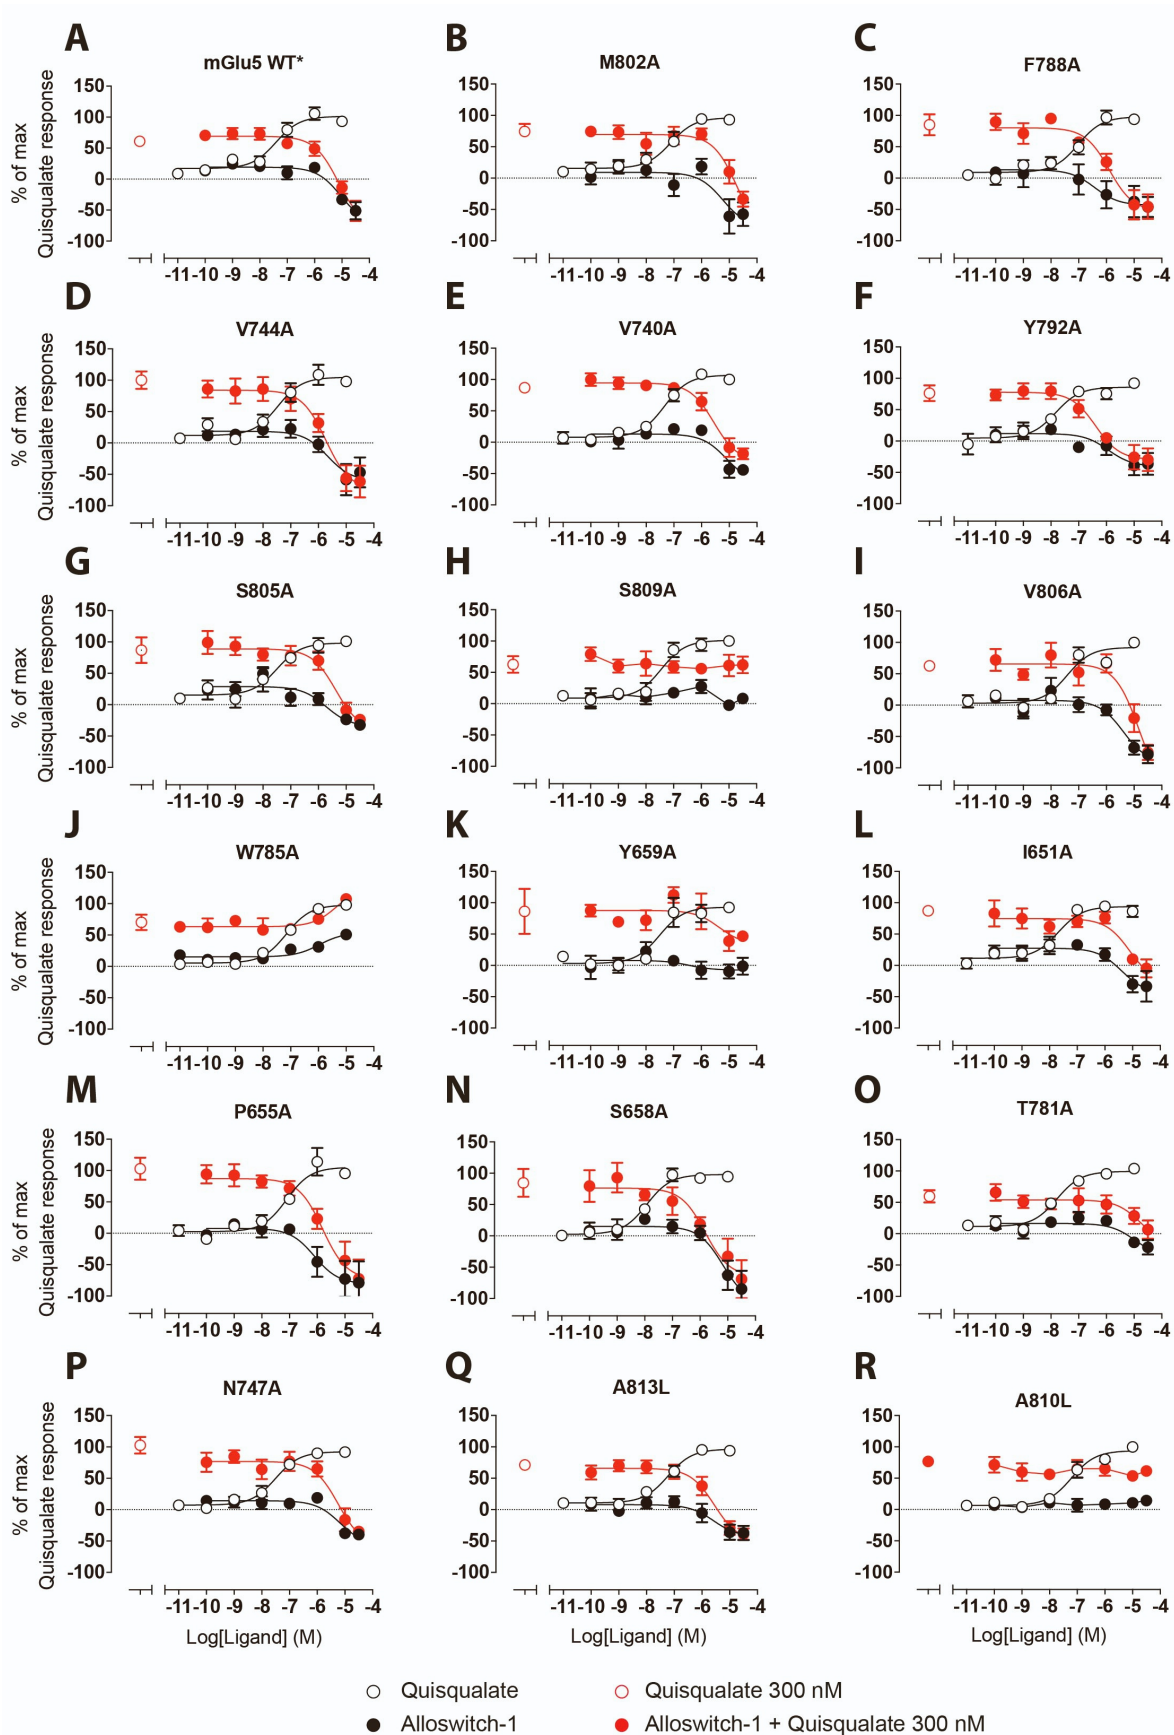

144

145 **Figure S10.** Probing the quisqualate and alloswitch-1 binding sites of mGlu<sub>5</sub> after illumination  
 146 with 380 nm light with IP<sub>1</sub> accumulation assay, Related to Figure 4. (A-R) Quisqualate-induced

147 IP<sub>1</sub> accumulation (open circles) and alloswitch-1 inhibition of IP<sub>1</sub> accumulation in the presence  
148 (red circles) or absence (black circles) of a fixed concentration of quisqualate (300 nM; red  
149 circles) for mGlu<sub>5</sub> mutants, under illuminated conditions. Single point mutations were tested  
150 for their response to quisqualate and/or alloswitch-1 function at the mGlu<sub>5</sub> under 380 nm  
151 conditions. Data are expressed as a percentage of the maximal quisqualate response and  
152 represent the mean  $\pm$  S.E.M. of at least three independent experiments performed in duplicate.  
153

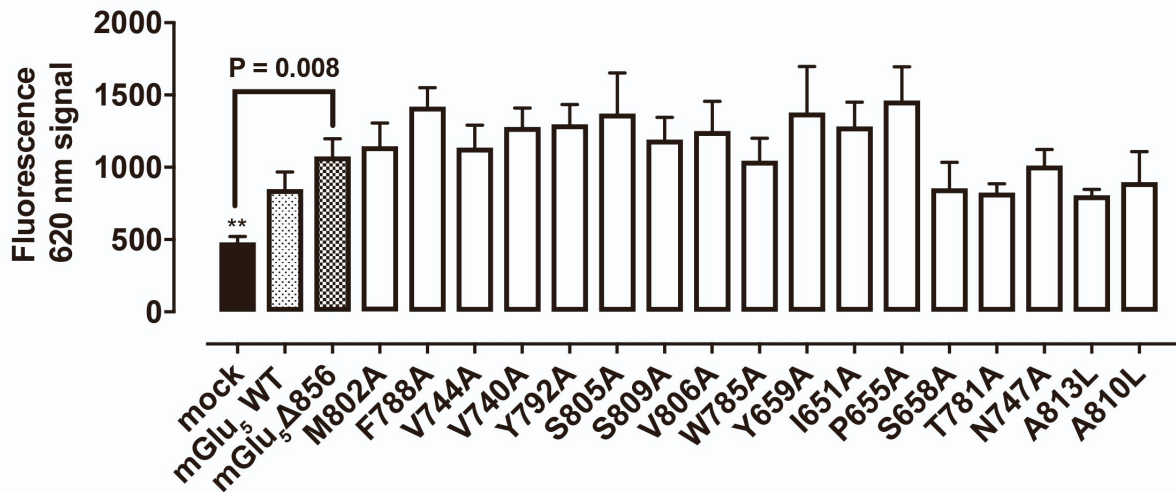

154

155 **Figure S11.** Quantification of cell surface expression of fluorescently labelled SNAP-tagged  
 156 wildtype or mutant mGlu<sub>5</sub> receptors, Related to Figure 4. Data are expressed as the mean ±  
 157 S.E.M. of at least three separate experiments performed in either duplicate or triplicate. Data  
 158 were analysed with a one-way ANOVA with post-hoc Dunnett's multiple comparison's test.  
 159 \*\*P<0.01 denotes significant difference in cell surface expression from the mGlu<sub>5</sub> WT  
 160 receptor expressing cells.

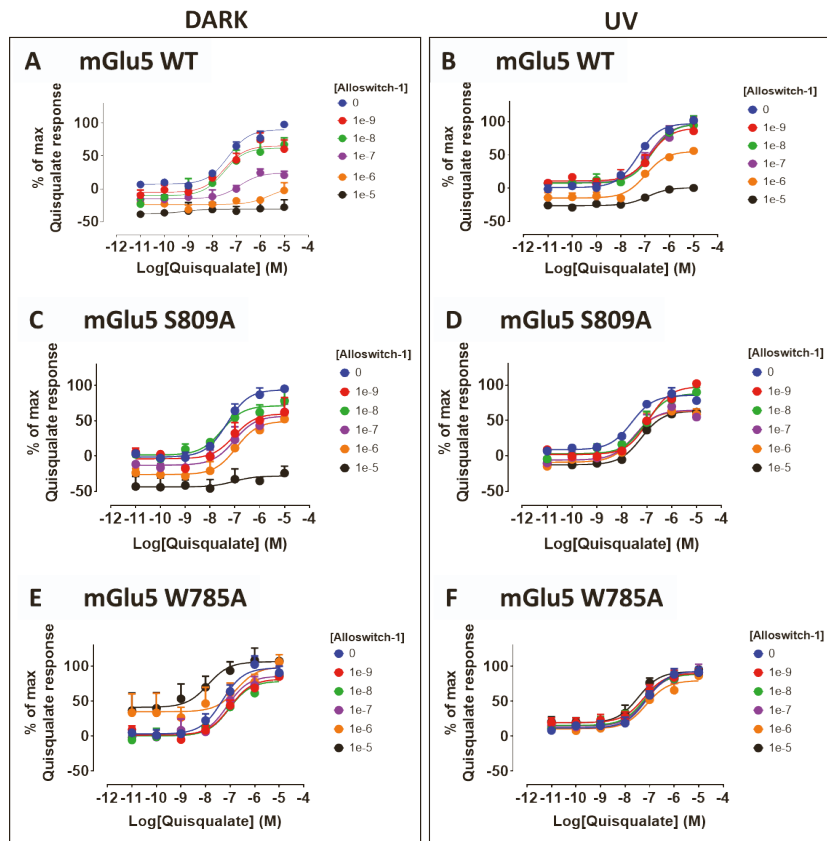

161  
 162 **Figure S12.** Interaction of the photoswitchable NAM, alloswitch-1, with the orthosteric  
 163 agonist, quisqualate, with mGlu<sub>5</sub> mutants in IP<sub>1</sub> accumulation assay, under dark or 380 nm  
 164 conditions, Related to Figure 4. (A, B) The response of WT mGlu<sub>5</sub> to alloswitch-1 in dark or  
 165 380 nm conditions are shown. The effect of the single point mutations S809A<sup>7,39</sup> (C, D) or  
 166 W785A<sup>6,50</sup> (E, F) on the ability of alloswitch-1 to inhibit quisqualate-induced IP<sub>1</sub> accumulation  
 167 in a concentration dependent manner was determined and compared to mGlu<sub>5</sub> WT, under dark  
 168 and 380 nm conditions. Data are expressed as a percentage of the maximal quisqualate response  
 169 and represent the mean ± S.E.M. of at least three independent experiments performed in  
 170 duplicate.



171  
 172  
 173  
 174  
 175  
 176  
 177  
 178  
 179  
 180

**Table S1.** Thermostability of human mGlu<sub>5</sub> mutants bound to the negative allosteric modulator MPEP, Related to Figure 1. The best single thermostable mutants A813L (mGlu<sub>5</sub>-1M ; TM7) was first selected and used as a platform for combining additional thermostable mutants in the following sequence order, T742A (TM5), S753A (TM5), T777A (TM6), and I799A (TM7). For each receptor mutants, mGlu<sub>5</sub>-1M, mGlu<sub>5</sub>-2M, mGlu<sub>5</sub>-3M, mGlu<sub>5</sub>-4M and the final thermostable mutant, mGlu<sub>5</sub>-5M, T<sub>m</sub> are expressed as the mean value from at least 3 independent experiments ( $\pm$  SEM), or  $\pm$  SD for the mean of 2 independent experiments.

| Mutants name                     | mGlu <sub>5</sub> mutations   | Apparent T <sub>m</sub> in MNG3 (°C) |
|----------------------------------|-------------------------------|--------------------------------------|
| mGlu <sub>5</sub> - $\Delta$ 856 | -                             | 20.7 $\pm$ 0.5, (n=12)               |
|                                  | R668A                         | 22.9 $\pm$ 0.3, (n=2)                |
|                                  | T742A                         | 24.1 $\pm$ 1.3, (n=6)                |
|                                  | G748A                         | 22.6 $\pm$ 0.4, (n=2)                |
|                                  | G794A                         | 23.2 $\pm$ 0.1, (n=2)                |
|                                  | S753A                         | 21.5 $\pm$ 0.2, (n=2)                |
|                                  | A787L                         | 25.3 $\pm$ 0.2, (n=3)                |
|                                  | T777A                         | 24.1 $\pm$ 1.0, (n=2)                |
|                                  | I799A                         | 26.5 $\pm$ 0.9, (n=3)                |
| mGlu <sub>5</sub> -1M            | A813L                         | 28.0 $\pm$ 1.2, (n=4)                |
|                                  | A855L                         | 22.4 (n=1)                           |
|                                  | A856L                         | 23.4 $\pm$ 0.9, (n=2)                |
| mGlu <sub>5</sub> -2M            | A813L/T777A                   | 32.5 $\pm$ 0.5, (n=4)                |
| mGlu <sub>5</sub> -3M            | A813L/T777A/S753A             | 34.5 $\pm$ 1.3, (n=3)                |
| mGlu <sub>5</sub> -4M            | A813L/T777A/S753A/I799A       | 37.0 $\pm$ 1.0, (n=2)                |
| mGlu <sub>5</sub> -5M            | A813L/T777A/S753A/I799A/T742A | 39.5 $\pm$ 0.6, (n=5)                |

181  
182  
183  
184  
185  
186  
  
187  
188  
189  
190  
191  
192  
193  
194  
195  
196  
197  
198  
199  
200

**Table S2.** Detergent-thermostability comparison between the human mGlu<sub>5</sub>-5M dimer and 7TM-mGlu<sub>5</sub>-5M, both bound to the negative allosteric modulator MPEP, Related to Figure 1. Apparent T<sub>m</sub> values from each detergent are expressed as the mean ± SEM from at least three independent experiments performed in duplicates, with the exception of C<sub>8</sub>E<sub>4</sub> for the mGlu<sub>5</sub>-5M construct. All detergents are supplemented with CHS.

| Solubilisation condition           | mGlu <sub>5</sub> construct | Apparent T <sub>m</sub> in detergents (°C) |
|------------------------------------|-----------------------------|--------------------------------------------|
| MNG3-CHS                           | mGlu <sub>5</sub> -5M       | 41.42 ± 0.18, (n=3)                        |
| DDM-CHS                            | mGlu <sub>5</sub> -5M       | 40.22 ± 0.24, (n=4)                        |
| DM-CHS                             | mGlu <sub>5</sub> -5M       | 32.75 ± 0.33, (n=4)                        |
| NG-CHS                             | mGlu <sub>5</sub> -5M       | 29.65 ± 0.32, (n=4)                        |
| C <sub>8</sub> E <sub>4</sub> -CHS | mGlu <sub>5</sub> -5M       | 28.76 ± 0.23, (n=2)                        |
| MNG3-CHS                           | 7TM-mGlu <sub>5</sub> -5M   | 33.81 ± 0.36, (n=5)                        |
| DDM-CHS                            | 7TM-mGlu <sub>5</sub> -5M   | 34.26 ± 0.29, (n=4)                        |
| DM-CHS                             | 7TM-mGlu <sub>5</sub> -5M   | 22.70 ± 0.26, (n=4)                        |
| NG-CHS                             | 7TM-mGlu <sub>5</sub> -5M   | 19.42 ± 0.30, (n=5)                        |
| C <sub>8</sub> E <sub>4</sub> -CHS | 7TM-mGlu <sub>5</sub> -5M   | 18.16 ± 0.67, (n=4)                        |

201 **Table S3.** Cryo-EM Statistics for map and model refinement, Related to Figure 2.

|                                                      | <b>PDB -7FD9, EMDB-31537<br/>mGlu<sub>5</sub> + LY341495 +MPEP</b> | <b>PDB-7FD8, EMDB-31536<br/>mGlu<sub>5</sub> +quisqualate+VU0424465</b> |
|------------------------------------------------------|--------------------------------------------------------------------|-------------------------------------------------------------------------|
| <b>Microscope</b>                                    | Titan Krios                                                        | Titan Krios                                                             |
| <b>Operating voltage</b>                             | 300 kV                                                             | 300 kV                                                                  |
| <b>Mode</b>                                          | EFTEM                                                              | EFTEM                                                                   |
| <b>Nominal magnification</b>                         | 130000x                                                            | 130000x                                                                 |
| <b>Pixel size (Å)</b>                                | 0.89                                                               | 0.89                                                                    |
| <b>Spot size</b>                                     | 7                                                                  | 7                                                                       |
| <b>Beam size (µm)</b>                                | 0.9                                                                | 1.05                                                                    |
| <b>C2 aperture (µm)</b>                              | 50                                                                 | 50                                                                      |
| <b>Objective aperture (µm)</b>                       | 100                                                                | 100                                                                     |
| <b>Exposure time (sec)</b>                           | 5.2                                                                | 9                                                                       |
| <b>Dose rate (e<sup>-</sup>/p/s)</b>                 | 7.6                                                                | 5.894                                                                   |
| <b>Fractions (# of frames)</b>                       | 32                                                                 | 48                                                                      |
| <b>Dose/frame (e<sup>-</sup>/Å<sup>2</sup>/s)</b>    | 1.56                                                               | 1.39                                                                    |
| <b>Total dose (e<sup>-</sup>/Å<sup>2</sup>)</b>      | 49.9                                                               | 67                                                                      |
| <b>No. of particles in final map</b>                 | 142191                                                             | 118016                                                                  |
| <b>Resolution nominal (Å), FSC 0.143</b>             | 4.0                                                                | 3.8                                                                     |
| <b>Auto B-factor sharpening (Å<sup>2</sup>)*</b>     | -164                                                               | -122                                                                    |
| <b>Refinement</b>                                    |                                                                    |                                                                         |
| <b>Starting models</b>                               | 7P2L**, 6n52,                                                      | 7P2L**, 6n50, 6n51,                                                     |
| <b>Model composition</b>                             |                                                                    |                                                                         |
| <b>Number of chains</b>                              | 2                                                                  | 2                                                                       |
| <b>Protein (No. of atoms)</b>                        | 5698                                                               | 6014                                                                    |
| <b>Ligands (NAG, CHS,<br/>Quisqualate, LY341495)</b> | 40                                                                 | 62                                                                      |
| <b>Model Refinement</b>                              |                                                                    |                                                                         |
| <b>FSC @ 0.5 (Å)</b>                                 | 4.3                                                                | 4.2                                                                     |
| <b>Average B factor (Å<sup>2</sup>)</b>              |                                                                    |                                                                         |
| <b>Overall</b>                                       | 147.5                                                              | 113.4                                                                   |
| <b>Protein</b>                                       | 148.0                                                              | 113.2                                                                   |
| <b>NAG</b>                                           | 93.7                                                               | 84.5                                                                    |
| <b>Quisqualate/LY341495</b>                          | 61.6                                                               | 38.8                                                                    |
| <b>CHS</b>                                           | -                                                                  | 185.1                                                                   |
| <b>RMS deviations</b>                                |                                                                    |                                                                         |
| <b>Bonds (Å)</b>                                     | 0.006                                                              | 0.006                                                                   |
| <b>Angles (°)</b>                                    | 1.1                                                                | 1.2                                                                     |
| <b>Validation</b>                                    |                                                                    |                                                                         |
| <b>Ramachandran Plot (favoured/outliers)</b>         | 93.6/0                                                             | 91.3/0.13                                                               |
| <b>Clash score</b>                                   | 9.1                                                                | 5.1                                                                     |
| <b>Molprobability score</b>                          | 1.9                                                                | 1.8                                                                     |

\* The auto B-factor sharpened map was used for model refinement. For map interpretation/model building, maps sharpened with multiple B-factors were used

\*\* - The 7TM used as template is the alloswitch-1 model in this study

203 **Table S4.** Residues in the VFT binding sites for LY341495 and quisqualate in the mGlu<sub>5</sub>  
 204 structure compared with binding site residues in mGlu<sub>1</sub>, 3 and 7, Related to Figure 3. Residues  
 205 shown are within 4.0 Å of the ligand.

206

| mGlu <sub>1</sub><br>PDB(3KS9) | mGlu <sub>5</sub><br>LY341495<br>(7FD9) | mGlu <sub>3</sub><br>(PDB 3SM9) | mGlu <sub>7</sub><br>(PDB 3MQ4) | mGlu <sub>5</sub><br>Quisqualate<br>(7FD8) |
|--------------------------------|-----------------------------------------|---------------------------------|---------------------------------|--------------------------------------------|
| Y74                            | Y64                                     | R64                             | N74                             | Y64-                                       |
|                                |                                         | R68                             | R78                             |                                            |
| W110                           | W100                                    |                                 |                                 | W100                                       |
| G163                           | G150                                    | S149                            | S157                            |                                            |
| S164                           | S151                                    | Y150                            | G158                            | S151                                       |
| S165                           | S152                                    | S151                            | S159                            | S152                                       |
| S186                           | S173                                    | A172                            | A180                            | S173                                       |
| A187                           | A174                                    | S173                            | S181                            | A174                                       |
| T188                           | T175                                    | T174                            | T182                            | T175                                       |
| S189                           |                                         | S175                            |                                 |                                            |
|                                |                                         |                                 |                                 |                                            |
| D208                           |                                         | D194                            |                                 |                                            |
| N235                           | N222                                    | 221                             | S229                            |                                            |
| Y236                           | Y223                                    | 222                             | Y230                            | Y223                                       |
|                                | E279                                    |                                 |                                 | E279                                       |
|                                |                                         |                                 |                                 | G280                                       |
| D318                           | D305                                    | D301                            |                                 | D305                                       |
| G319                           |                                         | G302                            |                                 | G306                                       |
|                                |                                         | K389                            | K407                            | K396                                       |

207

208 **Table S5.** Potency estimates for quisqualate-stimulated IP<sub>1</sub> accumulation or alloswitch-1  
 209 inhibition of IP<sub>1</sub> accumulation in the presence or absence of a fixed concentration of  
 210 quisqualate (300 nM), under dark conditions at mGlu<sub>5</sub> mutations, Related to Figure 4.  
 211 Estimated potency values represent the mean ± S.E.M. of at least three independent  
 212 experiments performed in duplicate. Data were fitted to a standard logistic function and  
 213 analysed by one-way ANOVA, with Dunnett's post-test. \**P*<0.05, \*\**P*<0.01, \*\*\**P*<0.001,  
 214 \*\*\*\**P*<0.0001 denotes significant difference of ligand potency at an mGlu<sub>5</sub>-Δ856 as compared  
 215 to the mGlu<sub>5</sub> WT receptor.

216

|                         | Quisqualate pEC <sub>50</sub><br>values (n) | Alloswitch-1<br>pIC <sub>50</sub> values (n) | Alloswitch-1 pIC <sub>50</sub> values,<br>when interacted with 300<br>nM quisqualate (n) |
|-------------------------|---------------------------------------------|----------------------------------------------|------------------------------------------------------------------------------------------|
| mGlu <sub>5</sub>       | 7.52±0.18(4)                                | 6.79±0.09(4)                                 | 6.66± 0.03(4)                                                                            |
| mGlu <sub>5</sub> -Δ856 | 7.30±0.10(9)                                | 6.94±0.13(9)                                 | 7.07±0.17(9)                                                                             |
| I651A <sup>3.36</sup>   | 7.38±0.07(4)                                | 6.90±0.13(4)                                 | 6.40±0.27(4)                                                                             |
| P655A <sup>3.40</sup>   | 7.39±0.11(3)                                | 7.24±0.11(4)                                 | 6.97±0.27(4)                                                                             |
| S658A <sup>3.43</sup>   | 7.56±0.32(4)                                | 7.27±0.26(4)                                 | 7.19±0.13(4)                                                                             |
| Y659A <sup>3.44</sup>   | 7.13±0.28(4)                                | 5.73±0.54(4)**                               | 5.28±0.36(3)****                                                                         |
| V740A <sup>5.40</sup>   | 6.90±0.09(4)                                | 7.14±0.02(4)                                 | 7.08±0.16(4)                                                                             |
| L744A <sup>5.44</sup>   | 7.41±0.06(4)                                | 7.30±0.06(4)                                 | 7.47±0.12(4)                                                                             |
| N747A <sup>5.47</sup>   | 7.31±0.16(4)                                | 5.93±0.46(4)*                                | 6.20±0.41(4)                                                                             |
| T781A <sup>6.46</sup>   | 8.13±0.24(4)**                              | 6.06±0.15(4)                                 | 5.84±0.19(4)**                                                                           |
| W785A <sup>6.50</sup>   | 7.24±0.12(4)                                | 5.50±0.09(4)***                              | 5.72±0.43(3)**                                                                           |
| F788A <sup>6.53</sup>   | 7.03±0.06(4)                                | 7.62±0.12(4)                                 | 7.48±0.23(4)                                                                             |
| Y792A <sup>6.57</sup>   | 7.55±0.06(4)                                | 7.56±0.23(4)                                 | 7.60 ±0.22(4)                                                                            |
| M802A <sup>7.32</sup>   | 7.28±0.05(4)                                | 6.80±0.19(4)                                 | 6.74±0.12(4)                                                                             |
| S805A <sup>7.35</sup>   | 7.39±0.08(4)                                | 6.99±0.24(4)                                 | 6.75±0.23(3)                                                                             |
| V806A <sup>7.36</sup>   | 7.10±0.15(4)                                | 7.19±0.37(4)                                 | 6.94±0.42(4)                                                                             |
| S809A <sup>7.39</sup>   | 7.39±0.23(4)                                | 5.46±0.26(4)***                              | 5.53±0.23(3)***                                                                          |
| A810L <sup>7.40</sup>   | 7.39±0.20(3)                                | n.d.                                         | 5.50±0.02(3)***                                                                          |
| A813L <sup>7.43</sup>   | 7.40±0.21(4)                                | 6.93±0.42(4)                                 | 6.90±0.20                                                                                |

217

218 **Table S6.** Potency estimates for quisqualate-stimulated IP<sub>1</sub> accumulation or alloswitch-1  
 219 inhibition of IP<sub>1</sub> accumulation in the presence or absence of a fixed concentration of  
 220 quisqualate (300 nM), under 380 nm conditions at mGlu<sub>5</sub> mutations, Related to Figure 4.  
 221 Estimated potency values represent the mean ± S.E.M. of at least three independent  
 222 experiments performed in duplicate. Data were fitted to a standard logistic function and  
 223 analysed by one-way ANOVA, potency values were compared to the mGlu<sub>5</sub>-Δ856 truncated  
 224 in the C-terminus after Alanine 856.  
 225

|                         | Quisqualate pEC <sub>50</sub><br>values (n) | Alloswitch-1<br>pIC <sub>50</sub> values (n) | Alloswitch-1 pIC <sub>50</sub> values,<br>when interacted with 300<br>nM quisqualate (n) |
|-------------------------|---------------------------------------------|----------------------------------------------|------------------------------------------------------------------------------------------|
| mGlu <sub>5</sub>       | 7.68±0.15(3)                                | 4.48±0.12(3)                                 | 5.31±0.29(4)                                                                             |
| mGlu <sub>5</sub> -Δ856 | 7.56±0.12(8)                                | 5.44±0.23(8)                                 | 5.58±0.24(8)                                                                             |
| I651A <sup>3.36</sup>   | 7.67±0.25(4)                                | 5.39±0.20(4)                                 | 5.16±0.13(4)                                                                             |
| P655A <sup>3.40</sup>   | 7.17±0.10(4)                                | n.d.                                         | n.d.                                                                                     |
| S658A <sup>3.43</sup>   | 7.91±0.14(4)                                | 5.51±0.35(4)                                 | 6.20±0.29(4)                                                                             |
| Y659A <sup>3.44</sup>   | 7.37±0.13(4)                                | 6.21±0.32(4)                                 | 5.61±0.31(3)                                                                             |
| V740A <sup>5.40</sup>   | 7.32±0.17(4)                                | 5.54±0.22(3)                                 | 6.07±0.75(3)                                                                             |
| L744A <sup>5.44</sup>   | 7.54±0.20(4)                                | 5.68±0.15(4)                                 | 5.70±0.09(4)                                                                             |
| N747A <sup>5.47</sup>   | 7.73±0.24(4)                                | 5.63±0.44(3)                                 | 5.70±0.31(4)                                                                             |
| T781A <sup>6.46</sup>   | 7.81±0.09(4)                                | n.d.                                         | n.d.                                                                                     |
| W785A <sup>6.50</sup>   | 7.30±0.17(4)                                | n.d.                                         | n.d.                                                                                     |
| F788A <sup>6.53</sup>   | 7.12±0.22(4)                                | 5.93±0.20(4)                                 | 5.89±0.15(4)                                                                             |
| Y792A <sup>6.57</sup>   | 7.85±0.15(4)                                | 6.16±0.59(4)                                 | 6.44±0.48(4)                                                                             |
| M802A <sup>7.32</sup>   | 7.42±0.10(4)                                | 5.58±0.32(4)                                 | 4.92±0.43(4)                                                                             |
| S805A <sup>7.35</sup>   | 7.69±0.40(4)                                | 5.84±0.17(4)                                 | 5.27±0.24(4)                                                                             |
| V806A <sup>7.36</sup>   | 7.25±0.22(4)                                | 5.43±0.22(4)                                 | 4.92±0.19(2)                                                                             |
| S809A <sup>7.39</sup>   | 7.53±0.15(4)                                | n.d.                                         | n.d.                                                                                     |
| A810L <sup>7.40</sup>   | 7.22±0.20(4)                                | n.d.                                         | n.d.                                                                                     |
| A813L <sup>7.43</sup>   | 7.26±0.17(3)                                | 5.76±0.38(3)                                 | 5.60±0.20(4)                                                                             |

226

227 **Table S7.** X-Ray Data collection and refinement statistics, Related to Figure 4.  
 228

| <b>PDB ID</b>                                                                                                                                                                               | <b>7P2L*</b>                         |
|---------------------------------------------------------------------------------------------------------------------------------------------------------------------------------------------|--------------------------------------|
| Space group                                                                                                                                                                                 | C2                                   |
| a, b, c (Å)                                                                                                                                                                                 | 141.69, 43.40, 82.12, 90, 99.384, 90 |
| $\alpha, \beta, \gamma$ (°)                                                                                                                                                                 | 90, 90, 90                           |
| Beamline                                                                                                                                                                                    | SLS-X06SA                            |
| Wavelength (Å)                                                                                                                                                                              | 1.0                                  |
| Resolution (Å)                                                                                                                                                                              | 41.45-2.54 (2.61–2.54)**             |
| <i>R</i> <sub>meas</sub>                                                                                                                                                                    | 0.25 (2.68)                          |
| I / $\sigma$ (I)                                                                                                                                                                            | 6.35 (1.05)                          |
| Completeness (%)                                                                                                                                                                            | 99.9 (100)                           |
| Multiplicity                                                                                                                                                                                | 10.66 (9.30)                         |
| CC1/2 (%)                                                                                                                                                                                   | 0.99 (0.51)                          |
| Refinement                                                                                                                                                                                  |                                      |
| Resolution (Å)                                                                                                                                                                              | 49.11-2.54                           |
| No. of unique reflections                                                                                                                                                                   | 16594                                |
| <i>R</i> <sub>work</sub> / <i>R</i> <sub>free</sub> ***                                                                                                                                     | 0.23/0.28                            |
| R.m.s. deviations                                                                                                                                                                           |                                      |
| Bond lengths (Å)                                                                                                                                                                            | 0.01                                 |
| Bond angles (°)                                                                                                                                                                             | 1.73                                 |
| B-factor                                                                                                                                                                                    |                                      |
| Total                                                                                                                                                                                       | 75.0                                 |
| Protein                                                                                                                                                                                     | 75.2                                 |
| Ligand                                                                                                                                                                                      | 57.2                                 |
| Water                                                                                                                                                                                       | 60.1                                 |
| Ramachandran Plot                                                                                                                                                                           |                                      |
| Favored (%)                                                                                                                                                                                 | 95.5                                 |
| Outlier (%)                                                                                                                                                                                 | 0.25                                 |
| Clash score                                                                                                                                                                                 | 2.6                                  |
| MolProbity score                                                                                                                                                                            | 1.4                                  |
| * Data processing and refinement statistics are reported with Friedel pairs merged.                                                                                                         |                                      |
| ** Values in parentheses are for the highest resolution shell.                                                                                                                              |                                      |
| *** <i>R</i> <sub>free</sub> was calculated using 5% of randomly selected subset of reflections and the remaining 95% of reflections was used for calculation of <i>R</i> <sub>work</sub> . |                                      |

229  
 230  
 231  
 232  
 233

234 **Table S8.** Potency measurement for agonist quisqualate-stimulated and ago-PAM VU0424465  
235 in IP<sub>1</sub> accumulation in the presence or absence of a fixed concentration of LY341495 (100  
236 μM), Related to Figure 5. Values are the average +/- S.E.M from at least 3 different  
237 experiments.

238

239

|                                             | mGlu <sub>5</sub> -Δ856 pEC <sub>50</sub> |
|---------------------------------------------|-------------------------------------------|
| LY341495                                    | 5.51 ± 0.63 (n=3)                         |
| Quisqualate                                 | 6.83 ± 0.16 (n=6)                         |
| Quisqualate + LY341495 (10 <sup>-4</sup> M) | 5.27 ± 0.05 (n=3)                         |
| VU0424465                                   | 7.47 ± 0.08 (n=6)                         |
| VU0424465+ LY341495 (10 <sup>-4</sup> M)    | 6.82 ± 0.05 (n=6)                         |

240

241

242

243
